# Supplementary material
Source: Springer Nature journal article supplement (https://www.springermedizin.de/resource/supplementary/12936_2014_3638_MOESM3_ESM.pdf/9546184)

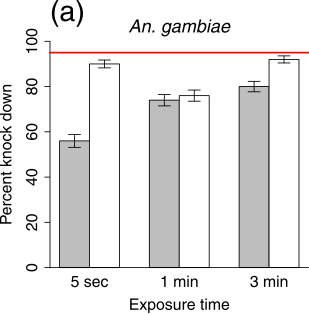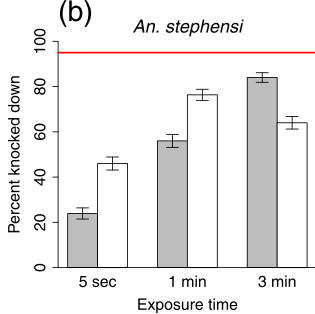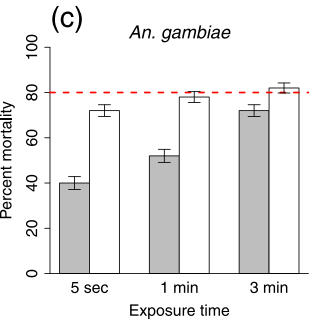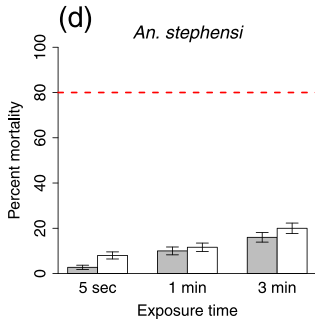

■ MCD bottle  
□ WHO cone

— 1 hr susceptibility threshold  
- - - 24 hr susceptibility threshold

Supplement: MOESM3 [file 9546184]
